1 **A spatial genomic approach identifies time lags and historic barriers to gene flow in a**  
2 **rapidly fragmenting Appalachian landscape**

3  
4 **Running title:** Spatial genomics and historic fragmentation

5  
6 **Thomas A. Maigret<sup>1,2,\*</sup>, John J. Cox<sup>2</sup>, and David W. Weisrock<sup>1</sup>.**

7 <sup>1</sup>University of Kentucky, Department of Biology, Lexington, KY 40506

8 <sup>2</sup>University of Kentucky, Department of Forestry and Natural Resources, Lexington, KY 40506

9  
10 **\*corresponding author, [thomas.maigret@uky.edu](mailto:thomas.maigret@uky.edu)**

11  
12 **Abstract:** The resolution offered by genomic data sets coupled with recently developed spatially  
13 informed analyses are allowing researchers to quantify population structure at increasingly fine  
14 temporal and spatial scales. However, uncertainties regarding data set size and quality thresholds  
15 and the time scale at which barriers to gene flow become detectable have limited both empirical  
16 research and conservation measures. Here, we used restriction site associated DNA sequencing  
17 to generate a large SNP data set for the copperhead snake (*Agkistrodon contortrix*) and address  
18 the population genomic impacts of recent and widespread landscape modification across an  
19 approximately 1000 km<sup>2</sup> region of eastern Kentucky. Nonspatial population-based assignment  
20 and clustering methods supported little to no population structure. However, using individual-  
21 based spatial autocorrelation approaches we found evidence for genetic structuring which closely  
22 follows the path of a historic highway which experienced high traffic volumes from ca. 1920 to  
23 1970. We found no similar spatial genomic signatures associated with more recently constructed

24 highways or surface mining activity, though a time lag effect may be responsible for the lack of  
25 any emergent spatial genetic patterns. Subsampling of our SNP data set suggested that similar  
26 results could be obtained with as few as 250 SNPs, and thresholds for missing data exhibited  
27 limited impacts on the spatial patterns we detected outside of very strict or permissive extremes.  
28 Our findings highlight the importance of temporal factors in landscape genetics approaches, and  
29 suggest the potential advantages of large genomic data sets and fine-scale, spatially-informed  
30 approaches for quantifying subtle genetic patterns in temporally complex landscapes.

31

32 **Key words:** copperheads, landscape genomics, road ecology, mountaintop mining, ddRAD

33

## 34 **Introduction**

35           Habitat loss and fragmentation resulting from natural resource extraction, agriculture, and  
36 urbanization is setting some populations on new demographic trajectories, with increasing and  
37 persistent genetic diversity loss (Haddad et al. 2015). Understanding the effects of this rapid  
38 landscape change on population structure and genetic diversity is critical for informing science-  
39 based conservation and management (Hilty et al. 2012, Keller et al. 2015, Waits et al. 2016).  
40 However, a variety of geographic and ecological factors can affect the amount and rate at which  
41 spatial genetic structuring builds in a given system, creating challenges for the development of  
42 proactive management plans (Epps and Keyghobadi 2015, Balkenhol et al. 2016, Richardson et  
43 al. 2016). Thus, while migration may be limited by contemporary landscape factors, genetic  
44 structure may not be detectable until many generations after a barrier forms, especially if the  
45 power to detect such patterns is limited by the quantity or quality of genetic data available  
46 (Landguth et al. 2010, McCartney-Melstad et al. 2018).

47           The use of large single nucleotide polymorphism (SNP) data sets has improved the  
48 detection of recent habitat fragmentation in several ways. First, increased genome-wide sampling  
49 reduces the number of individuals needed to quantify differentiation among sampling locations  
50 (Willing et al. 2012, Nazareno et al. 2017). With this lower threshold for per-locale individual  
51 sampling, genomic data can permit sampling schemes encompassing a broader geographic area  
52 and a more hierarchical design, thus allowing for more robust resolution of patterns at multiple  
53 spatial scales (Anderson et al. 2010, Balkenhol and Fortin 2016). Furthermore, while the  
54 relatively high mutation rate of microsatellites is advantageous for detecting recent genetic  
55 change (Epps and Keyghobadi 2015), the greater genome-wide sampling of large SNP data sets  
56 can potentially detect weaker spatial genetic patterns resulting from relatively recent or porous

57 barriers to gene flow (Landguth et al. 2012). For example, McCartney-Melstad et al. (2018)  
58 found that with as few as 300-400 SNPs, genetic structure associated with the barrier effects of  
59 roads could be detected in amphibian populations where 12 microsatellite loci had previously  
60 indicated no structure. SNP data sets of this size are now readily available through methods such  
61 as restriction site-associated DNA sequencing (RADseq), allowing for the generation of  
62 thousands of loci from non-model organisms with a range of ecological characteristics that may  
63 make them prone to the genetic effects of recent habitat fragmentation (Epps and Keyghobadi  
64 2015).

65         While traditional methods of testing for spatial genetic patterns, such as model-based  
66 clustering (e.g., STRUCTURE, Pritchard et al. 2000) or non-parametric exploratory data analyses  
67 (e.g., DAPC, Jombart et al. 2010), have been used to characterize genetic diversity across a given  
68 area (François and Waits 2015), other methods which are able to separate spatial and non-spatial  
69 genetic variation may be better equipped to detect patterns of genetic differentiation in recently  
70 fragmented systems or those with high rates of gene flow (Jombart et al. 2008, Galpern et al.  
71 2014). These methods use spatial autocorrelation to tease apart patterns of inter- versus intra-  
72 population genetic variation, improving the identification of population structure at fine  
73 geographic scales (Galpern et al. 2012). When coupled with genomic data, spatially-informed  
74 analyses may also allow for the detection of weak spatial structure related to recent habitat  
75 fragmentation or incomplete barriers to migration (Richardson et al. 2016, Richardson et al.  
76 2017, Combs et al. 2018, Combs et al. 2018a). However, alongside these methodological  
77 improvements, work remains to understand the amount of genomic data necessary to assess  
78 spatial genetic patterns (e.g., McCartney-Melstad et al. 2018), and the effects of genomic data  
79 quality on the resolution of recently evolved population structure.

80 Identifying spatial genetic patterns associated with landscape features is especially  
81 pertinent in regions experiencing rapid and recent landscape change. Few regions have  
82 experienced this change as rapidly as central Appalachia in the eastern United States, chiefly as a  
83 result of the large-scale surface coal mining practices often referred to as ‘mountaintop removal’  
84 (Wickham et al. 2007, Drummond and Loveland 2010, Pericak et al. 2018, Maigret et al. 2019).  
85 Alongside mining, the wholesale construction of several high-traffic road systems in the 1970s  
86 and 1980s, in part to facilitate the transportation needs of the mining sector, have further  
87 subdivided what was formerly a relatively continuous forest landscape with scant high-traffic  
88 roads (KTC 2018). Despite the scale of these changes, the effects on native biodiversity are not  
89 well understood (Wickham et al. 2013). Given the historically rugged terrain of Appalachia,  
90 topographic homogenization produced by surface mining may facilitate dispersal of terrestrial  
91 fauna not encumbered by the radically altered soils, flora, and thermal regimes of reclaimed  
92 minelands (Wickham et al. 2013), and highways may also facilitate movement in some species  
93 (Trombulak and Fissell 2000). Alternatively, less vagile taxa that rely on sparsely distributed  
94 microhabitats may be more sensitive to the effects of forest fragmentation, especially if they are  
95 susceptible to road mortality.

96 We sought to understand the impact of recent and major landscape changes on the  
97 population structure of the copperhead (*Agkistrodon contortrix*), an abundant snake in eastern  
98 Kentucky (Barbour 1962) generally not capable of long-distance (> 1km) individual movements  
99 (Sutton et al. 2017). Copperheads rely on rocky hibernacula located high on steep-sided, south-  
100 facing slopes for overwintering (Maigret and Cox 2018), sites disproportionately destroyed by  
101 surface mining (Maigret et al. 2019). Copperheads are also generally intolerant of dense,  
102 invasive vegetation common to many reclaimed surface mines (Carter et al. 2015, Carter et al.

103 2017). Additionally, herpetofauna generally, and pit vipers in particular, have been shown to be  
104 especially vulnerable to vehicular traffic (Andrews and Gibbons 2005, Shepard et al. 2008), and  
105 elevated genetic differentiation associated with highways has been detected using microsatellite  
106 markers (Clark et al. 2010, DiLeo et al. 2013). Pertinent to this point, our study area contains  
107 several major highways [ $> 3,000$  Annual Average Daily Traffic (AADT)] constructed between  
108 1970 and 1985 which could be barriers to movement for *A. contortrix*. Nearly all these highways  
109 were constructed along new paths and do not follow major hydrological or topographic features  
110 for the majority of their route through the study area. From at least 1900 until 1970, however, the  
111 only highway across the study area was KY State Route 476 (formerly old KY State Route 15;  
112 hereafter referred to as KY-476). Prior to 1970, KY-476 was a major thoroughfare through the  
113 region, following the sinuous course of Troublesome Creek, a tributary of the North Fork of the  
114 Kentucky River. This constrained vehicle speed and made the route prone to frequent flood  
115 damage, prompting the development and opening of the new KY-15 c. 1975, leading to  
116 markedly decreased traffic volumes on KY-476 (~500 vehicles/day) and pushing most traffic,  
117 including many coal-industry commercial vehicles to the new KY-15 (~ 5,000 vehicles/day).

118         Using RADseq data and nonspatial and spatially informed analyses, we investigated the  
119 potential for recently formed population structure across *A. contortrix* in eastern Kentucky as a  
120 result of this landscape change, with a particular focus on the effects of habitat fragmentation via  
121 surface coal mining and through the network of historic (c. 1920) and more recently-constructed  
122 (c. 1975) high-traffic roads. Specifically, we aimed to: (1) understand the extent and scale of  
123 spatial genomic structuring in copperheads across what was until recently a heavily forested  
124 landscape; (2) test for associations between current landcover classes and patterns of spatial  
125 genomic diversity; (3) identify current or historic linear landscape features which are associated

126 with reduced gene flow, and (4) understand how the size and quality of a data set can affect our  
127 ability to detect spatial genomic patterns. More broadly, we aim to shed light on the temporal  
128 scale at which barriers to gene flow are detectable using large SNP data sets, to investigate the  
129 potential role of spatially-informed methods for identifying recent or weak genetic boundaries,  
130 and to provide a starting point for future research into the spatial genetic implications of  
131 increasingly popular methods of surface mining.

132

## 133 **Methods**

134

### 135 *2.1 Sampling methods*

136 We sampled *A. contortrix* individuals from an approximately 1,000 km<sup>2</sup> area of Breathitt,  
137 Knott, and Perry counties in eastern Kentucky, USA (Figure 1). We used a hierarchical sampling  
138 strategy, sampling at arrays of four to six individual capture sites (Figure 1A). Each individual  
139 capture site consisted of a location where a combination of artificial cover and visual encounter  
140 surveys were used to capture snakes. An array was composed of at least four individual capture  
141 sites, separated by 2-3 km, and arranged roughly in a cross or an 'x'. In turn, each array was  
142 separated by roughly 10-20 km, providing comparisons at multiple spatial scales both within and  
143 between each array (Balkenhol and Fortin 2016). Between May 2014 and September 2016,  
144 individuals were captured at sampling sites, typically under artificial cover (e.g., sheet metal or  
145 other debris). We augmented this design by including individuals captured apart from designated  
146 individual capture sites; typically, these snakes were found alive or dead on roadways within the  
147 study area or were killed and/or donated by area residents who were able to provide precise  
148 locality information for each tissue sample. Live-captured snakes were restrained and two ventral

149 scales were removed, placed in 95% ethanol, and subsequently frozen at -80°C (Maignet 2019).

150 Muscular tissue from the tails of dead snakes was treated similarly.

151

## 152 *2.2. DNA sequencing and SNP calling*

153 We extracted genomic DNA using a Qiagen DNeasy Blood and Tissue Extraction Kit  
154 and prepared double digest RADseq (ddRADseq) libraries based on Peterson et al. (2012). DNA  
155 was quantified using a Qubit 2.0 fluorometer (Thermo-Fisher). DNA extractions  $\leq 2.0$  ng/uL  
156 were amplified using a Qiagen REPLI-g high-fidelity whole genome amplification kit. We  
157 prepared ddRADseq libraries using ~1000 ng of DNA per individual. DNA was digested using  
158 EcoRI and SphI and subsequently cleaned with Agencourt Ampure XP beads (Beckman  
159 Coulter). Adaptor ligation was performed using one of 48 unique 5 bp barcodes in combination  
160 with a universal 6 bp single-index PCR adaptor. Samples were then pooled in groups of 8, bead  
161 cleaned, and size selected ( $526 \text{ bp} \pm 10\%$ ) with a Pippin Prep (Sage Science). Each 8-sample  
162 pool was then Qbit quantified and amplified using Phusion high-fidelity PCR (New England  
163 Biolabs) with a PCR primer with one of three unique barcodes, permitting each individual to be  
164 identified uniquely using a combination of the unique PCR barcode and a unique adaptor index.  
165 After cleaning and quantifying PCR product, we used an Agilent 2100 Bioanalyzer to confirm  
166 target fragment size distributions before 150 bp paired-end sequencing on two lanes of an  
167 Illumina Hi-Seq 2500. Individuals were randomly assigned to a lane with respect to geographic  
168 location to reduce downstream genetic artefacts (Meirmans 2015).

169 We used Stacks v1.37 (Catchen et al. 2013) to identify orthologous loci across  
170 individuals. No overlap was expected between sequencing reads; therefore, we used a custom  
171 script to stitch together forward and reverse reads. We used process\_radtags to demultiplex



172 individuals and discard low-quality reads containing uncalled bases or a mean quality score < 10  
173 in a sliding window comprising 15% of the read. After quality filtering, reads were assembled  
174 using `denovo_map`, with a minimum stack depth of 5 ( $m = 5$ ), 3 mismatches allowed between  
175 stacks within individuals ( $M = 3$ ), and 2 mismatches allowed between stacks among individuals  
176 ( $n = 2$ ). To increase confidence in our SNP calls, we used `rxstacks` to remove SNPs with a low  
177 log likelihood (`--ln_lim = -25`) and/or a high proportion of confounded loci (`conf_lim = 0.25`).  
178 After running `rxstacks`, `cstacks` and `sstacks` were re-run with the filtered loci. We sampled a  
179 single SNP per locus (`--write-single-snp`), using only SNPs with < 50% missing data, a minor  
180 allele frequency < 0.015, and no evidence of excess heterozygosity. Finally, we removed  
181 individuals with > 50% missing data.

182

### 183 *2.3 Summary statistics and distance-based analyses*

184 We generated a genetic dissimilarity matrix using the program `bed2diffs v1` in the EEMS  
185 package (Petkova et al. 2016). This produced a matrix of average individual pairwise genetic  
186 dissimilarity (hereafter referred to as the “GDM”) based on allelic frequencies, similar to the  
187 proportion of shared alleles (Bowcock et al. 1994). We estimated effective population size using  
188 the linkage disequilibrium method in `NeEstimator` (Do et al. 2014). We estimated heterozygosity  
189 and nucleotide diversity using `plink` and `vcftools`, respectively (Purcell et al. 2007, Danecek et al.  
190 2011). We calculated the relationship between geography and the GDM using the `ecodist`  
191 package in R. Mantel correlograms were generated for multiple geographic distances, including  
192 Euclidean distance, the natural log of distance, stream (hydrological) distance, and the natural  
193 log of stream distance. To quantify stream distances, we used the Origin-Destination Cost Matrix  
194 tool in `ArcMap v10.1` (ESRI, Redlands, CA) and a shapefile of USGS stream paths obtained

195 from the KY Division of Geographic Information. We chose to use stream paths as a proxy for  
196 potential elevation effects given the rugged terrain of the study area.

197

#### 198 *2.4 Nonspatial analyses of population structure*

199 To identify and characterize genetic clusters across our study area, we used both  
200 discriminant analysis of principal components (DAPC) in the adegenet R package (Jombart et al.  
201 2010) and Bayesian clustering via STRUCTURE (Pritchard et al. 2000). For our DAPC analyses,  
202 we first used the find.clusters function, retaining all principal components (PCs) and selecting  
203 the  $K$  value with the lowest Bayesian information criterion (BIC). Individuals were then  
204 ordinated in PC space using the dapc function. To reduce the potential for over-fitting, we  
205 selected the number of retained PCs in light of diminishing returns from retaining excess PCs  
206 (Jombart et al. 2010).

207 For our STRUCTURE analyses, we estimated population assignment of individuals using  
208 an admixture model with cluster numbers ranging from  $K = 1$  to 10. Five replicates were run for  
209 each  $K$ , each for 1,000,000 generations after a burn-in of 100,000 generations. We used Structure  
210 Harvester v0.6.9.4 (Earl and von Holt 2012) to generate mean log likelihood values for each  $K$   
211 and identify the optimal number of clusters for our data using  $\Delta K$  (Evanno et al. 2005). We used  
212 the program CLUMPAK to compute cluster membership coefficients across replicates (Kopelman  
213 et al. 2015).

214

#### 215 *2.5 Spatially informed analyses of population structure*

216 To further test for genetic structure across our study system, we used three recently  
217 developed approaches that integrate spatial information into analyses based on genetic

218 dissimilarity. First, we used MEMGENE (Galpern et al. 2014), a regression-based analysis based  
219 on the spatial autocorrelation among a given set of georeferenced individuals and a  
220 corresponding GDM. Individual samples are mapped based on geographic location, and  
221 significant eigenvector scores are overlaid to provide a visualization of the geographic nature of  
222 genetic dissimilarity among individuals.

223       Second, we used the program sPCA (Jombart et al. 2008) implemented in the R package  
224 adegenet. sPCA is broadly similar to MEMGENE (but see Galpern et al. 2014:Appendix S4), but  
225 relies on an ordination approach based on Moran's *I* index to identify eigenvectors which  
226 maximize variation in allele frequencies and spatial autocorrelation, and then maps these  
227 eigenvectors on to geographic coordinates. Our analyses used a nearest-neighbor connection  
228 network with  $k = 40$  neighbors to maximize potential connectivity across our large number of  
229 spatially distinct samples. We relied on the eigenvalue variance and spatial components plots to  
230 select the optimal number of global and local axes to retain, and used the recommended  
231 multivariate significance test to identify significant global and local genomic structure.

232       Third, to take into consideration the impact of landscape features on gene flow, we  
233 estimated a resistance model using the R package ResistanceGA (Peterman 2018). ResistanceGA  
234 uses a genetic algorithm approach to optimize the individual resistance values associated with a  
235 given resistance surface based on genetic dissimilarity data. Model fit of the optimized surfaces  
236 are quantified using AIC values from linear mixed-effects models, both for each surface  
237 individually and for all combinations of individual surfaces. Thus, ResistanceGA bypasses the  
238 often-subjective expert opinion parameterization stage of resistance surface construction (Spear  
239 et al. 2016, Peterman et al. 2018). Our ResistanceGA input landscape surfaces consisted of land  
240 cover classification data obtained from 2011 National Land Cover Data. We reclassified raw

241 NLCD raster values into 3 different resistance surfaces of two categories each, including: (1) a  
242 mining surface with two categories, mined and unmined land, (2) a surface representing the route  
243 of current highways, with two categories, highway and non-highway, and (3) a surface  
244 representing the route of KY-476, also with two categories, highway and non-highway (Table  
245 S1). We tested both for effects of each of these three surfaces independently and each possible  
246 combination of the three. We reclassified NLCD raster classes using the Reclassify tool in the  
247 Spatial Analyst extension of ArcMap 10.3.3, producing our three putative resistance surfaces.  
248 We relied on historic road maps publicly available from the KY Transportation Cabinet to  
249 identify current and historic highway patterns in the study area from 1936 to the present, and  
250 historic topographic maps from the US Geological Survey's Historical Topographic Map  
251 Explorer for information on routes before 1936. Our response data set was our individual  
252 pairwise GDM, which we ran alongside our land cover raster surface using the 'costDistance'  
253 function in the R package gdistance (van Etten 2017). This function calculates least cost paths  
254 between each pair of locations, and while lacking the comprehensive approach available with  
255 random walk commute times, least cost paths represent a much more computationally tractable  
256 approach for our spatial and genetic data set (Peterman 2018).

257

## 258 *2.6 Subsampling of our SNP data set*

259 We aimed to assess the resolving power of two of the spatially informed methods, sPCA  
260 and MEMGENE, based on: (1) the number of loci, and (2) the amount of missing data. To examine  
261 the effect of the number of loci, we randomly subsampled our full 2,140 SNP data set, producing  
262 subsets of 25, 50, 100, 250, 500, and 1,000 loci. For each subset, ten replicates were generated  
263 using plink and analyzed in sPCA and MEMGENE as described above for the full data set. To

264 examine the effects of missing data, we re-filtered our raw SNP data set using missing data  
265 thresholds of 0.05 (i.e., retaining only loci present in  $\geq 95\%$  of individuals), 0.10, 0.25, 0.40, 0.5,  
266 0.75, 0.90, and 0.95. While these represented our thresholds, our realized data sets typically had  
267 smaller amounts of missing data, in aggregate, than each threshold. Only a single data set could  
268 be produced for each missing data threshold.

269 Differences in the how sPCA and MEMGENE are designed influenced how we quantified  
270 our subsampling and missing data threshold results. For sPCA, we first detected significant  
271 patterns of structuring, then tabulated the proportion of replicates with unrelated, similar, or  
272 identical spatial genomic patterns as detected in analysis of the full data set. Model outputs for  
273 sPCA include global and local permutation tests of structuring, the p-values of which were  
274 obtained for each level of subsampling and missing data thresholds, which we averaged across  
275 ten replicates for the former. MEMGENE, on the other hand, only analyzes significant spatial  
276 patterns, and nonsignificant patterns are not retained for downstream analyses. Thus, for  
277 MEMGENE, we obtained  $R^2$  values only for levels of subsampling and missing data thresholds  
278 where significant spatial patterns were observed, and we quantified spatial patterns which were  
279 unrelated, similar, or identical, in a similar fashion to our sPCA results. We visualized these  
280 results by charting p-values from local and global tests from sPCA alongside  $R^2$  values from  
281 MEMGENE for each missing data threshold, and by charting both these statistical values and the  
282 proportion of similar patterns for each subsampling level. While categorizing spatial patterns in  
283 terms of their similarity to those generated using our full data set requires some qualitative  
284 assessment of the results, we chose not to use more substantial quantitative metrics for  
285 comparison (e.g., spatial point pattern analysis) given the limited number of sampling sites.  
286

## 287 **Results**

288

### 289 *3.1 Sequencing results*

290 We generated ~239 million 150 bp paired-end reads, with a mean of 1,869,394 reads per  
291 individual. Increasing or decreasing the minimum read depth between 4 and 7 did not affect any  
292 summary statistics, and only marginally affected the number of loci in our data (Table S2). After  
293 filtering, we recovered genotypes for 77 individuals from 34 different locations (Figure 1). This  
294 included a total of 2,140 loci, with an average missing data rate of 23.5% of loci per individual  
295 (min. = 4.4%; max. = 48.9%).

296

### 297 *3.2 Summary of genetic diversity*

298 Across our study area, we estimated  $H_O = 0.193$ ,  $H_E = 0.24$ ,  $\pi = 0.242$ , and  $F_{IS} = 0.195$ .  
299 We estimated an  $N_e$  of 635.8 (95% CI: 595.6, 681.6). We identified weak, but sometimes  
300 significant correlations between genetic and different measures of geographic distances,  
301 including Euclidean ( $p = 0.79$ ,  $R^2 = -0.0003$ ), natural log of Euclidean ( $p = 0.0006$ ,  $R^2 = 0.0037$ ),  
302 hydrological distance ( $p < 0.0001$ ,  $R^2 = 0.0054$ ), and natural log of hydrological distance ( $p =$   
303  $0.003$ ,  $R^2 = 0.0029$ ). Mantel correlograms of correlation by distance class similarly showed  
304 minimal evidence of isolation-by-distance (Figure S1).

305

### 306 *3.3 Non-spatial population structure*

307 Neither DAPC nor STRUCTURE analyses supported the presence of multiple  
308 geographically distinct genetic clusters. BIC scores in DAPC were lowest for  $K = 1$  (Figure 2a),  
309 and an exploration of cluster assignments using the first PC axis and a  $K = 2$  did not produce

310 individual assignments corresponding to sampling localities or geography. STRUCTURE analyses  
311 identified a  $K = 3$  as the best-fit clustering model for our data based on the  $\Delta K$  statistic (Figure  
312 2b). However, at this level of clustering all individuals were nearly equally assigned to all three  
313 clusters, indicating a lack of population structure; these results were similar at a  $K = 2$ .

314

### 315 *3.3 Spatially informed population structure*

316 sPCA analyses identified significant global structure across the study area ( $p = 0.002$ ).  
317 The first global (positive) sPCA axis identified a population genetic break that closely followed  
318 the path of KY-476 (Figure 3a). Based on a scree plot and a plot of eigenvalues, this first global  
319 axis contained the most information relative to other axes, and support for any of the local  
320 (negative) axes was not of congruent strength (Figure S2a-b).

321 The first variable identified as significant in the MEMGENE analysis explained a high  
322 proportion of the total variance across three retained axes (0.81). The proportion of overall  
323 genetic variance explained by spatial patterns associated with this first variable was modest (adj.  
324  $R^2 = 0.061$ ), yet was similar to the proportion explained by other studies at similar spatial scales  
325 (Galpern et al. 2014, Combs et al. 2018a). Visualization of the first and most explanatory MEM  
326 variable similarly identified a genetic break that partitioned populations on either side of KY-476  
327 (Figure 3b). No genetic breaks identified an influence of landcover or current highway paths.

328 Landscape resistance analyses in ResistanceGA supported a null model of no geographic  
329 structure, followed by a model of isolation by distance (Tale S3). Models that included the three  
330 individual resistance surfaces (landcover, current highways, or historic highways), or any  
331 combination of resistance surfaces, were not strongly supported.

332

### 333 3.4 *Subsampling of SNP data set*

334 sPCA analysis of subsampled SNP data sets produced significant detection of global  
335 structure with as few as 25 loci (average global p-value of ten replicates = 0.067, Fig. 4a),  
336 although data sizes  $\geq 250$  loci were needed to produce identical patterns to those generated with  
337 the full data set (mean global  $p = 0.0033$ ). At  $\geq 500$  loci identical patterns were produced in all  
338 replicates. Significant local structure was not supported for any level of subsampling (mean local  
339 p-value = 0.34). MEMGENE analysis of subsampled SNP data sets produced identical patterns in a  
340 majority of replicates when sampling  $\geq 100$  loci (Fig. 4b). However, identical results were still  
341 detected in 50% of replicates when sampling 50 loci and produced in all replicates when  
342 sampling 1000 loci.

343 The performance of sPCA and MEMGENE was not adversely affected by the inclusion of  
344 higher levels of missing data (Fig. 4c). Global p-values from sPCA analysis were significant at  $\geq$   
345 25% missing data and remained so, even when the data set allowed for as much as 95% missing  
346 data per individual. Missing data levels  $\leq 10\%$  resulted in a loss of significant global spatial  
347 structure, and we note the peculiarity that data sets of smaller locus number resulted in  
348 significant detection of global structure in our subsampled data replicates, suggesting the  
349 potential for Type I error with small data sets. Non-zero  $R^2$  estimates were produced in  
350 MEMGENE analyses of data sets permitting  $\geq 40\%$  missing and increased with higher levels of  
351 missing data, up to 75%.

352

## 353 **Discussion**

354

355 *Non-spatial vs. spatially informed inference of population structure*



356           Here, we present empirical evidence for the ability of some spatially informed methods to  
357 detect weak population structure in study systems where more traditional and non-spatially  
358 informed methods indicate a lack of structure. Patterns in both DAPC and Structure results were  
359 consistent with a  $K = 1$  model, with no evidence for geographically distinct genetic clusters  
360 across the study area. In contrast, the spatially informed methods sPCA and MEMGENE returned  
361 similar results supporting geographic genetic structure with a break coinciding with the path of  
362 KY-476, a historically-important highway that served as a major traffic artery in the region  
363 between c. 1920-1975. The inference of weak population structure and genetic fragmentation on  
364 the landscape of our study system is bolstered by multiple lines of evidence. First, both sPCA  
365 and MEMGENE identified the same geographic genetic break. While these methods both use  
366 spatial autocorrelation in the analysis of genetic data, they operate in very different ways: sPCA  
367 relies on the integration of Moran's I matrix via a connection network, while MEMGENE uses a  
368 forward selection method to identify significant MEM eigenvectors, and then uses a regression  
369 approach to generate output variables which contain the spatial patterns (Galpern et al. 2014).  
370 The congruence of these results indicates that our result is probably not a spurious pattern driven  
371 by an artefact of one particular analysis. Second, while the magnitude of population structure  
372 detected in our work was generally weak—MEMGENE-based regression analyses attributed ~6%  
373 of total genetic variation to spatial effects—this amount of spatially explained genetic variation  
374 is in the range of that detected with MEMGENE under simulated models of population  
375 fragmentation and higher than that detected for panmictic populations (Galpern et al. 2014). This  
376 level of spatially driven genetic variation is also similar to that detected in other studies of  
377 recently fragmented landscapes (Combs et al. 2018a, Combs et al. 2018b). Our overall  
378 interpretation of these results is that the use of methods that specifically use spatial patterns of

379 variation, such as sPCA and MEMGENE, seem to be able to identify patterns of weak population  
380 structure at temporal and spatial scales where more widely used non-spatial methods would fail  
381 to discern geographic population structure (Galpern et al. 2014).

382 In contrast, our estimates of population structure using optimized landscape resistance  
383 generated using ResistanceGA did not support a link between genetic differentiation and  
384 landscape features. This lack of spatially informed population structure may be related to  
385 methodological aspects of this program, as it does not use the autocorrelation approach that is  
386 built in to sPCA and MEMGENE. In addition, our analyses were limited to only analyzing least  
387 cost paths. ResistanceGA does allow for a more exhaustive exploration of restricted gene flow  
388 across the landscape using a random-walk framework, which may have identified fragmentation  
389 associated with landscape features that were not examined using a least cost path approach.  
390 However, this required a computationally prohibitive set of analyses given our level of locality  
391 sampling and landcover data resolution. Coupled with the relatively weak nature of the spatial  
392 genomic signal associated with the route of KY-476, our ability to detect resistance to gene flow  
393 based on landcover classes may have been comparatively limited.

394

#### 395 *Data size and quality in the detection of weak population structure*

396 While our large genomic data set may have also increased our ability to detect subtle  
397 spatial patterns, random subsampling of our data indicated that thousands of SNPs may not be  
398 necessary to detect weak population structure similar to that found with our full data set. In fact,  
399 we found that several hundred SNPs may be sufficient to consistently identify weak spatial  
400 structure. This result is similar to that of a recent study (McCartney-Melstad et al. 2018), which  
401 showed that the use of a more limited set of independent SNPs (~300-400) was sufficient to

402 recover fine-scale population structure using the non-spatial method Admixture (Alexander et al.  
403 2009) with results similar to those obtained with a larger, more-complete data set (3095 SNPs).  
404 Our subsampling work extends this finding, indicating that spatially informed methods of  
405 population structure may be equally efficient with relatively modest sized data sets (~250-500  
406 loci). We do note that minimum locus thresholds will vary based on the intensity of the spatial  
407 genetic signal, the number of individuals sampled, and a variety of other factors. However, these  
408 developing empirical findings provide an optimistic outlook on the minimum data size required  
409 for the detection of weak landscape-level fragmentation.

410         Our exploration of the inclusion of missing data yielded similarly optimistic results,  
411 where, under a wide range of thresholds, missing genotypes did not substantially alter our spatial  
412 landscape genomic findings. Using stringent missing genotype thresholds, which also lowered  
413 the number of SNPs in the data, actually decreased the spatial signal. Conversely, allowing for  
414 more missing data increased the signal of population structure in our data, with a plateau in the  
415 level of significance (sPCA) and amount of spatial variation explained (MEMGENE). The effect of  
416 missing data in population and evolutionary studies has seen mixed results. Simulation-based  
417 results have indicated that missing genotypes in RADseq data can result in substantial biases in a  
418 range of population genetic summary statistics, including  $F_{ST}$  (Arnold et al. 2013). In contrast,  
419 the use of more liberal missing data thresholds in RADseq-based phylogenetic studies has  
420 provided opportunities to recover phylogenetic patterns not detected using more stringent  
421 thresholds (Wagner et al. 2013, Eaton et al. 2017; but see Leaché et al. 2015). This may be due to  
422 a bias whereby loci with higher mutation rates, but likely to contain population or phylogenetic  
423 information, are eliminated by stringent missing thresholds (Huang and Knowles 2014). The  
424 effect of missing data in landscape genomic studies has yet to be thoroughly explored, and we

425 suggest based on our results that some spatially informed analyses may be robust to the recovery  
426 of patterns of weak population structure despite the inclusion of a high level of missing  
427 genotypes, but that parameter estimation at this geographic scale (e.g., migration rates) may be  
428 more strongly influenced. Therefore, when possible, we second the recommendation of others  
429 (Wagner et al. 2013, O’Leary et al. 2018) for researchers to explore the sensitivity of their results  
430 across a range of different missing data thresholds.

431

### 432 *Copperhead landscape genomics and temporal considerations*

433 Our results further emphasize an association between high-traffic roads and genetic  
434 differentiation in pit vipers (Clark et al. 2010, DiLeo et al. 2010, DiLeo et al. 2013, Bushar et al.  
435 2015, Herrmann et al. 2017, but see Weyer et al. 2014). These findings are in addition to field  
436 studies that have suggested the outsized role played by road mortality in snakes, and  
437 herpetofauna more generally (Andrews and Gibbons 2005, Row et al. 2007, Shepard et al. 2008).  
438 Furthermore, our results suggest that the effects of high-traffic roads and associated intense  
439 human activity might persist for decades after traffic volumes decline, in line with predictions  
440 from simulations (Landguth et al. 2010).

441 We did not find evidence for a strong influence of surface coal mining on genetic  
442 connectivity, which was surprising given the widespread nature of surface mining in the study  
443 area, and the wholesale shifts in vegetation, soils, topography, and fauna that characterize the  
444 mining and mine reclamation process. Surface mining of coal in Appalachia has a high degree of  
445 spatial and temporal variance; portions of mines can exist in various states of reclamation from  
446 barren rock to early successional forest, and mining activity can cease for months to years as a  
447 result of fluctuating coal prices or labor disputes, thus providing opportunities for animals to

448 maintain genetic connectivity in these novel landscapes. Regardless, we recommend further  
449 research into this generally understudied area, as the large scale and radical impacts of this  
450 mining practice may well result in detectable impacts in populations of other taxa (Wickham et  
451 al. 2013). This may be especially true for species with shorter generation times, smaller  
452 population sizes, and more exclusive associations with ridgetop forests (Epps and Keyghobadi  
453 2015, Maigret et al. 2019).

454 We note that the connection between the identified genetic fragmentation and the historic  
455 highway KY-476 is a largely qualitative assessment, and several specific caveats deserve  
456 mention. The route of KY-476 corresponds not only to a highway path, but also to a swath of  
457 comparatively higher historic human population density and also to the route of Troublesome  
458 Creek, either of which could be factors more important than the highway itself. While modeling  
459 relative contributions of population density and road mortality is beyond the scope of our study,  
460 in terms of parallel geomorphology and hydrology, the historic highway path does not  
461 correspond to any major feature which might be expected to seriously reduce movement of  
462 copperheads (Figure S3). Other waterways which divide our sampling locations, including Lost  
463 Creek and Buckhorn Creek, are of similar size to Troublesome Creek. Moreover, copperheads  
464 and other pit vipers regularly cross bodies of water (T. Maigret, unpublished data; Clark et al.  
465 2010), and studies have found that even hydropower reservoirs are ineffective barriers to gene  
466 flow in copperheads and similar species (Oyler-McCance and Parker 2010, Levine et al. 2016).  
467 More generally, a second caveat is that while we intended our sampling to be hierarchical in  
468 design, the broad scales at which genomic patterns exist in our study area means that we are  
469 examining a single functional landscape. When possible, landscape-scale replication would  
470 provide a more robust assessment of the effects of current and historic landscape features on

471 gene flow in *A. contortrix* and similar taxa (Short Bull et al. 2011). Moreover, assuming we have  
472 detected a spatial genomic pattern stemming from historic highway traffic, we have not  
473 determined the traffic threshold which would produce a noticeable spatial genetic pattern or the  
474 precise time lag which must pass before these patterns become detectable. Other research has  
475 suggested that even low amounts of traffic can produce genetic differentiation (Clark et al.  
476 2010), and depending on a variety of demographic characteristics, numerous generations may  
477 need to pass before genetic differentiation becomes apparent (Landguth et al. 2010, Epps and  
478 Keyghobadi 2015). Thus, while we may have detected the effect of a historic roadway, we have  
479 not conclusively ruled out impacts of current roadways, or even low-traffic and unpaved county  
480 roads not included in our analysis. In a similar manner, our findings regarding the spatial genetic  
481 implications of surface mines should also be understood tentatively.

482 Our study adds to a growing list highlighting the potential for large SNP data sets to  
483 detect weak, recent, or otherwise subtle spatial genomic patterns (González-Serna et al. 2018,  
484 McCartney-Melstad et al. 2018, Murphy et al. 2018, Tan et al. 2018). Considering the problems  
485 time lags present for conservation planning, the use of large (> 250) SNP data sets and spatially  
486 informed analyses of genetic diversity will likely become increasingly important for placing  
487 patterns of population structuring in their proper genomic, temporal, and geographic contexts.

488

#### 489 **Data Accessibility**

490

491 Sequence data, SNP calls, landcover rasters, and sample catalogs will be accessible upon  
492 acceptance via NCBI's sequence read archive (SRA) at accession number PRJNA6278371.

493

494 **Acknowledgements**

495 Our work was conducted under University of Kentucky Institutional Animal Care and Use  
496 Committee (IACUC) Protocol 2012-0954. Funding was provided by a Theodore Roosevelt  
497 Memorial Grant (American Museum of Natural History), McIntire Stennis Project KY009031  
498 (US Department of Agriculture, National Institute of Food and Agriculture), a Kerri Casner  
499 Environmental Sciences Fellowship (Tracy Farmer Institute for Sustainability and the  
500 Environment), and an Eilers-Billing Award (University of Kentucky Appalachian Center). We  
501 are grateful for field assistance provided by David Collett, Erwin Williams, Chris Osborne, Ted  
502 Sizemore, Neva Williams, Grover Napier, RB Combs, Anthony Campbell, Scotty Brewer, Mark  
503 Chaffins, Doran Howard, Taylor Hughes, Rudy Noble, Verle Fugate, the late Geraldine  
504 McIntosh, and other residents of Breathitt, Perry, and Knott counties. We thank the University of  
505 Kentucky's Center for Computational Sciences and Information Technology Services Research  
506 Computing for use of the Lipscomb Computing Cluster resources. We are grateful for the  
507 laboratory assistance of Nicolette Lawrence, Kara Jones, Mary Foley, and Ricky Grewelle.  
508

## 509 List of Figures

510 **Figure 1:** Map of our study area and sampling localities superimposed over (A) the current and  
511 historic highway network, with sampling arrays (indicated with a-e) to which each sampling site  
512 belongs, and (B) landcover, including surface coal mines, forest, and other non-forest habitat.

513  
514 **Figure 2:** Results of nonspatial population structure analyses, including (a)  $\Delta K$  and individual  
515 assignment plots from Structure for  $K = 3$  and  $K = 2$ , and (b) BIC and individual assignment  
516 plots from DAPC. Letters beneath each individual assignment plot correspond to the  
517 geographically distinct sampling arrays depicted in Figure 1a.

518  
519 **Figure 3:** Results of our spatially informed population structure analyses. (a) Results of sPCA  
520 analyses visualized using interpolated vector scores, showing divergence coinciding with the  
521 historic highway path (designated in this study as KY-476), but not with landcover or current  
522 highway infrastructure. (b) Results of MEMGENE analysis, which suggests similar patterns of  
523 population structure associated with KY-476. Circle color and size represent the association and  
524 genetic similarity, respectively, along the first MEM variable axis.

525  
526 **Figure 4:** Effects of the number of loci and missing data on (a) sPCA and (b) MEMGENE results,  
527 and the effects of missing data levels on both sets of results (c). For (a) and (b), the left y-axis  
528 represents the proportion of results which were identical, partially identical, or unrelated to the  
529 results obtained from the full data set depicted in Figure 3. Visualization results from each  
530 replicate are available in Figure S4. The right y-axis for (a) represents p-values from global and  
531 local tests for structuring.

## 532 533 Supplementary Material

534  
535 **Figure S1:** Mantel correlograms for individual genetic differentiation versus (a) Euclidean  
536 distance, (b) natural log of Euclidean distance, (c) stream distance, and (d) natural log of stream  
537 distance. Filled circles represent significant values at  $\alpha = 0.05$ .

538  
539 **Figure S2:** Eigenvalue plot (a) and scree plot (b) of local and global axes obtained from our  
540 sPCA analyses. The first global axis, in red, was the only axis retained, and displays unique  
541 separation from other potential axes in the scree plot (labeled as  $\lambda_1$ ).

542  
543 **Figure S3:** Digital elevation model of study area, with sample points corresponding to Figure 1.

544  
545 **Figure S4:** Visualizations of results from each of the ten replicates for each random subset of  
546 loci, and each level of missing data. Includes (a) interpolated vector scores from sPCA, (b)  
547 plotted scores from sPCA, and (c) plotted MEM scores for significant results.

548  
549 **Table S1:** Landcover reclassification scheme for our ResistanceGA resistance surface.

550  
551 **Table S2:** Summary statistics for read depths from  $m = 4$ ,  $m = 5$ , and  $m = 7$ .

552



553 **Table S3:** Model output from our ResistanceGA least-cost path analyses. A null model of no  
554 geographic structure and a model of isolation-by-distance outperformed all combinations of  
555 resistance surfaces based on historic roads, current roads, and surface mining.

## 556 Literature Cited

- 557
- 558 Alexander, D. H., Novembre, J., and Lange, K. 2009. Fast model-based estimation of ancestry in  
559 unrelated individuals. *Genome Research* 19: 1655–1664.
- 560 Anderson, C.D., Epperson, B.K., Fortin, M.J., Holderegger, R., James, P.M., Rosenberg, M.S.,  
561 Scribner, K.T. and Spear, S. 2010. Considering spatial and temporal scale in landscape-  
562 genetic studies of gene flow. *Molecular Ecology* 19: 3565-3575
- 563 Andrews, K. M., and Gibbons, J. W. 2005. How do highways influence snake movement?  
564 Behavioral responses to roads and vehicles. *Copeia* 2005: 772-782.
- 565 Arnold, B., Corbett-Detig, R. B., Hartl, D., and Bomblies, K. 2013. RADseq underestimates  
566 diversity and introduces genealogical biases due to nonrandom haplotype sampling.  
567 *Molecular Ecology* 22:3179–3190.
- 568 Balkenhol, N., and Fortin, M. J. 2016. Basics of study design: Sampling landscape heterogeneity  
569 and genetic variation for landscape genetic studies. *In: Landscape Genetics: Concepts,*  
570 *Methods, Applications, First Edition.* John Wiley and Sons Ltd., p. 58-76.
- 571 Balkenhol, N., Cushman, S. A., Waits, L. P., and Storfer, A. 2016. Current status, future  
572 opportunities, and remaining challenges in landscape genetics. *In: Landscape Genetics:*  
573 *Concepts, Methods, Applications, First Edition.* John Wiley and Sons Ltd., p. 247-255.
- 574 Barbour, R.W. 1962. An aggregation of copperheads, *Agkistrodon contortrix*. *Copeia* 1962: 640.
- 575 Bowcock, A. M., Ruiz-Linares, A., Tomfohrde, J., Minch, E., Kidd, J. R., and Cavalli-Sforza, L.  
576 L. 1994. High resolution of human evolutionary trees with polymorphic microsatellites.  
577 *Nature* 368: 455-457.
- 578 Bushar, L. M., Bhatt, N., Dunlop, M. C., Schocklin, C., Malloy, M. A., and Reinert, H. K. 2015.  
579 Population isolation and genetic subdivision of timber rattlesnakes (*Crotalus horridus*) in  
580 the New Jersey Pine Barrens. *Herpetologica* 71: 203-211.
- 581 Carter, E. T., Eads, B. C., Ravesi, M. J., and Kingsbury, B. A. 2015. Exotic invasive plants alter  
582 thermal regimes: implications for management using a case study of a native ectotherm.  
583 *Functional Ecology* 29: 683-693.
- 584 Carter, E. T., Ravesi, M. J., Eads, B. C., and Kingsbury, B. A. 2017. Invasive plant management  
585 creates ecological traps for snakes. *Biological Invasions* 19: 443-453.
- 586 Catchen, J., Hohenlohe, P. A., Bassham, S., Amores, A., and Cresko, W. A. 2013. Stacks: an  
587 analysis tool set for population genomics. *Molecular Ecology* 22: 3124-3140.
- 588 Clark, R. W., Brown, W. S., Stechert, R., and Zamudio, K. R. 2010. Roads, interrupted dispersal,  
589 and genetic diversity in timber rattlesnakes. *Conservation Biology* 24:1059-1069.
- 590 Combs, M., Puckett, E.E., Richardson, J., Mims, D. and Munshi-South, J., 2018. Spatial  
591 population genomics of the brown rat (*Rattus norvegicus*) in New York City. *Molecular*  
592 *Ecology* 27: 83-98.
- 593 Combs, M., Byers, K.A., Gherzi, B.M., Blum, M.J., Caccone, A., Costa, F., Himsforth, C.G.,  
594 Richardson, J.L. and Munshi-South, J., 2018a. Urban rat races: spatial population  
595 genomics of brown rats (*Rattus norvegicus*) compared across multiple cities. *Proceedings*  
596 *of the Royal Society B: Biological Sciences* 285: 20180245.
- 597 Danecek, P., Auton, A., Abecasis, G., Albers, C.A., Banks, E., DePristo, M.A., Handsaker, R.E.,  
598 Lunter, G., Marth, G.T., Sherry, S.T. and McVean, G. 2011. The variant call format and  
599 VCFtools. *Bioinformatics* 27: 2156-2158.
- 600 DiLeo, M. F., Row, J. R., and Loughheed, S. C. 2010. Discordant patterns of population structure  
601 for two co-distributed snake species across a fragmented Ontario landscape. *Diversity*

- 602 and Distributions 16: 571-581.
- 603 DiLeo, M. F., Rouse, J. D., Dávila, J. A., and Lougheed, S. C. 2013. The influence of landscape  
604 on gene flow in the eastern massasauga rattlesnake (*Sistrurus c. catenatus*): insight from  
605 computer simulations. *Molecular Ecology* 22: 4483-4498.
- 606 Do, C., Waples, R.S., Peel, D., Macbeth, G.M., Tillett, B.J. and Ovenden, J.R. 2014.  
607 NeEstimator v2: re-implementation of software for the estimation of contemporary  
608 effective population size (Ne) from genetic data. *Molecular Ecology Resources* 14: 209-  
609 214.
- 610 Drummond, M. A., and Loveland, T. R. 2010. Land-use pressure and a transition to forest-cover  
611 loss in the eastern United States. *BioScience* 60: 286-298.
- 612 Earl, D. A., and von Holdt, B. M. 2012. STRUCTURE HARVESTER: a website and  
613 program for visualizing STRUCTURE output and implementing the Evanno method.  
614 *Conservation Genetics Resources* 4: 359-361.
- 615 Eaton, D. A. R., Spriggs, E. L., Park, B., and Donoghue, M. J. 2017. Misconceptions on missing  
616 data in rad-seq phylogenetics with a deep-scale example from flowering plants.  
617 *Systematic Biology* 66: 399-412.
- 618 Epps, C.W. and Keyghobadi, N. 2015. Landscape genetics in a changing world: disentangling  
619 historical and contemporary influences and inferring change. *Molecular Ecology* 24:  
620 6021-6040.
- 621 Evanno, G., Regnaut, S. and Goudet, J. 2005. Detecting the number of clusters of individuals  
622 using the software STRUCTURE: a simulation study. *Molecular Ecology* 14:2611-2620.
- 623 François, O., and Waits, L. P. 2015. Clustering and assignment methods in landscape genetics.  
624 *In: Landscape Genetics: Concepts, Methods, Applications, First Edition*. John Wiley and  
625 Sons Ltd., p.114-128.
- 626 Galpern, P., Manseau, M. and Wilson, P. 2012. Grains of connectivity: analysis at multiple  
627 spatial scales in landscape genetics. *Molecular Ecology* 21: 3996-4009.
- 628 Galpern, P., Peres-Neto, P. R., Polfus, J., and Manseau, M. 2014. MEMGENE: Spatial pattern  
629 detection in genetic distance data. *Methods in Ecology and Evolution* 5: 1116-1120.
- 630 González-Serna, M. J., Cordero, P. J., and Ortego, J. 2018. Using high-throughput sequencing to  
631 investigate the factors structuring genomic variation of a Mediterranean grasshopper of  
632 great conservation concern. *Scientific Reports* 8: 13436.
- 633 Haddad, N.M., Brudvig, L.A., Clobert, J., Davies, K.F., Gonzalez, A., Holt, R.D., Lovejoy, T.E.,  
634 Sexton, J.O., Austin, M.P., Collins, C.D., and Cook, W.M. 2015. Habitat fragmentation  
635 and its lasting impact on Earth's ecosystems. *Science Advances* 1: e1500052.
- 636 Herrmann, H. W., Pozarowski, K. M., Ochoa, A., and Schuett, G. W. 2017. An interstate  
637 highway affects gene flow in a top reptilian predator (*Crotalus atrox*) of the Sonoran  
638 Desert. *Conservation Genetics* 18: 911-924.
- 639 Hilty, J. A., Lidicker Jr, W. Z., and Merenlender, A. 2012. *Corridor ecology: the science and  
640 practice of linking landscapes for biodiversity conservation*. Island Press, Washington,  
641 D.C., USA.
- 642 Huang, H., and Knowles, L. L. 2014. Unforeseen consequences of excluding missing data from  
643 next-generation sequences: simulation study of RAD sequences. *Systematic Biology* 65:  
644 357-365.
- 645 Jombart, T., Devillard, S., Dufour, A. B., and Pontier, D. 2008. Revealing cryptic spatial patterns  
646 in genetic variability by a new multivariate method. *Heredity* 101: 92-103.
- 647 Jombart, T., Devillard, S., and Balloux, F. 2010. Discriminant analysis of principal components:

- 648 a new method for the analysis of genetically structured populations. *BMC Genetics* 11:  
649 94.
- 650 Keller, D., Holderegger, R., van Strien, M. J., and Bolliger, J. 2015. How to make landscape  
651 genetics beneficial for conservation management? *Conservation Genetics* 16: 503-512.
- 652 Kentucky Transportation Cabinet [KTC]. 2018. Historical Maps: download archived county road  
653 aid maps. <<https://transportation.ky.gov/Planning/Pages/Historical-Maps.aspx>> Accessed  
654 1 January 2019.
- 655 Kentucky Transportation Cabinet [KTC]. 2019. Interactive statewide traffic counts map.  
656 <<https://transportation.ky.gov/Planning/Pages/Traffic-Counts.aspx>> Accessed 30 January  
657 2019.
- 658 Kopelman, N.M., Mayzel, J., Jakobsson, M., Rosenberg, N.A. and Mayrose, I. 2015. Clumpak: a  
659 program for identifying clustering modes and packaging population structure inferences  
660 across K. *Molecular Ecology Resources* 15: 1179-1191.
- 661 Landguth, E.L., Cushman, S.A., Schwartz, M.K., McKelvey, K.S., Murphy, M. and Luikart, G.  
662 2010. Quantifying the lag time to detect barriers in landscape genetics. *Molecular*  
663 *Ecology* 19: 4179-4191.
- 664 Landguth, E.L., Fedy, B.C., Oyler-McCance, S.J., Garey, A.L., Emel, S.L., Mumma, M.,  
665 Wagner, H.H., Fortin, M.J. and Cushman, S.A. 2012. Effects of sample size, number of  
666 markers, and allelic richness on the detection of spatial genetic pattern. *Molecular*  
667 *Ecology Resources* 12: 276-284.
- 668 Leaché, A.D., Banbury, B. L., Felsenstein, J., De Oca, A. N.-M., and Stamatakis, A. 2015. Short  
669 tree, long tree, right tree, wrong tree: new acquisition bias corrections for inferring snp  
670 phylogenies. *Systematic Biology* 64: 1032–1047.
- 671 Levine, B. A., Smith, C. F., Douglas, M. R., Davis, M. A., Schuett, G. W., Beaupre, S. J.,  
672 and Douglas, M. E. 2016. Population genetics of the copperhead at its most  
673 northeastern distribution. *Copeia* 104: 448-457.
- 674 Maigret, T.A., and J.J. Cox. 2018. *Agkistrodon contortrix*: Hibernacula. *Herpetological Review*  
675 49:123.
- 676 Maigret, T.A. 2019. Snake scale clips as a source of high-quality DNA suitable for RAD  
677 sequencing. *Conservation Genetics Resources*: in press.
- 678 Maigret, T.A., Cox, J.J., and J. Yang. 2019. Persistent geophysical effects of mining threaten  
679 ridgetop biota of Appalachian forests. *Frontiers in Ecology and the Environment* 17: 85-  
680 91.
- 681 McCartney-Melstad, E., Vu, J. K., and Shaffer, H. B. 2018. Genomic data recover previously  
682 undetectable fragmentation effects in an endangered amphibian. *Molecular Ecology* 27:  
683 4430-4443.
- 684 Meirmans, P. G. 2015. Seven common mistakes in population genetics and how to avoid them.  
685 *Molecular Ecology* 24: 3223-3231.
- 686 Murphy, M. O., Jones, K. S., Price, S. J., and Weisrock, D. W. 2018. A genomic assessment of  
687 population structure and gene flow in an aquatic salamander identifies the roles of spatial  
688 scale, barriers, and river architecture. *Freshwater Biology* 63: 407-419.
- 689 Nazareno, A. G., Bemmels, J. B., Dick, C. W., and Lohmann, L. G. 2017. Minimum sample  
690 sizes for population genomics: An empirical study from an Amazonian plant species.  
691 *Molecular Ecology Resources* 17: 1136-1147.
- 692 O'Leary, S. J., Puritz, J. B., Willis, S. C., Hollenbeck, C. M., and Portnoy, D. S. 2018. These  
693 aren't the loci you're looking for: principles of effective SNP filtering for molecular

- 694 ecologists. *Molecular Ecology* 27: 3193-3206.
- 695 Pericak, A.A., Thomas, C.J., Kroodsmas, D.A., Wasson, M.F., Ross, M.R., Clinton, N.E.,  
696 Campagna, D.J., Franklin, Y., Bernhardt, E.S. and Amos, J.F. 2018. Mapping the yearly  
697 extent of surface coal mining in Central Appalachia using Landsat and Google Earth  
698 Engine. *PLoS one* 13: e0197758.
- 699 Peterson, B. K., Weber, J. N., Kay, E. H., Fisher, H. S., and Hoekstra, H. E. 2012. Double digest  
700 RADseq: an inexpensive method for de novo SNP discovery and genotyping in model  
701 and non-model species. *PLoS one* 7: e37135.
- 702 Peterman, W. E. 2018. ResistanceGA: An R package for the optimization of resistance surfaces  
703 using genetic algorithms. *Methods in Ecology and Evolution* 9: 1638-1647.
- 704 Petkova, D., Novembre, J., and Stephens, M. 2016. Visualizing spatial population structure with  
705 estimated effective migration surfaces. *Nature Genetics* 48: 94-100.
- 706 Pritchard, J. K., Stephens, M., and Donnelly, P. 2000. Inference of population structure  
707 using multilocus genotype data. *Genetics* 155: 945-959.
- 708 Purcell, S., Neale, B., Todd-Brown, K., Thomas, L., Ferreira, M.A., Bender, D., Maller, J., Sklar,  
709 P., De Bakker, P.I., Daly, M.J. and Sham, P.C. 2007. PLINK: a tool set for whole-  
710 genome association and population-based linkage analyses. *The American Journal of*  
711 *Human Genetics* 81: 559-575.
- 712 Richardson, J. L., Brady, S. P., Wang, I. J., and Spear, S. F. 2016. Navigating the pitfalls and  
713 promise of landscape genetics. *Molecular Ecology* 25: 849-863.
- 714 Richardson, J.L., Burak, M.K., Hernandez, C., Shirvell, J.M., Mariani, C., Carvalho-Pereira,  
715 T.S., Pertile, A.C., Panti-May, J.A., Pedra, G.G., Serrano, S. and Taylor, J. 2017. Using  
716 fine-scale spatial genetics of Norway rats to improve control efforts and reduce  
717 leptospirosis risk in urban slum environments. *Evolutionary Applications* 10: 323-337.
- 718 Row, J. R., Blouin-Demers, G., and Weatherhead, P. J. 2007. Demographic effects of road  
719 mortality in black ratsnakes (*Elaphe obsoleta*). *Biological Conservation* 137: 117-124.
- 720 Shepard, D. B., Dreslik, M. J., Jellen, B. C., and Phillips, C. A. 2008. Reptile road mortality  
721 around an oasis in the Illinois corn desert with emphasis on the endangered eastern  
722 massasauga. *Copeia* 2008: 350-359.
- 723 Short Bull, R.A., Cushman, S.A., Mace, R., Chilton, T., Kendall, K.C., Landguth, E.L.,  
724 Schwartz, M.K., McKelvey, K., Allendorf, F.W. and Luikart, G. 2011. Why replication  
725 is important in landscape genetics: American black bear in the Rocky Mountains.  
726 *Molecular Ecology* 20: 1092-1107.
- 727 Sutton, W. B., Wang, Y., Schweitzer, C. J., and McClure, C. J. 2017. Spatial ecology and multi-  
728 scale habitat selection of the Copperhead (*Agkistrodon contortrix*) in a managed forest  
729 landscape. *Forest Ecology and Management* 391: 469-481.
- 730 Tan, D.J., Chattopadhyay, B., Garg, K.M., Cros, E., Ericson, P.G., Irestedt, M. and Rheindt, F.E.  
731 2018. Novel genome and genome-wide SNPs reveal early fragmentation effects in an  
732 edge-tolerant songbird population across an urbanized tropical metropolis. *Scientific*  
733 *Reports* 8: 12804.
- 734 Trombulak, S. C., and Frissell, C. A. 2000. Review of ecological effects of roads on terrestrial  
735 and aquatic communities. *Conservation Biology* 14: 18-30.
- 736 van Etten, J.V. 2017. R package gdistance: distances and routes on geographical grids.  
737 Available: <https://cgspace.cgiar.org/handle/10568/83180>. Accessed 1 September 2018.
- 738 Wagner, C.E., Keller, I., Wittwer, S., Selz, O.M., Mwaiko, S., Greuter, L., Sivasundar, A. and  
739 Seehausen, O. 2013. Genome-wide RAD sequence data provide unprecedented

- 740 resolution of species boundaries and relationships in the Lake Victoria cichlid adaptive  
741 radiation. *Molecular Ecology* 22: 787-798.
- 742 Waits, L. P., Cushman, S. A., and Spear, S. F. 2016. Applications of landscape genetics to  
743 connectivity research in terrestrial animals. *In: Landscape Genetics: Concepts, Methods,*  
744 *Applications, First Edition.* John Wiley and Sons Ltd., p. 199-219.
- 745 Weyer, J., Jørgensen, D., Schmitt, T., Maxwell, T. J., and Anderson, C. D. 2014. Lack of  
746 detectable genetic differentiation between den populations of the Prairie Rattlesnake  
747 (*Crotalus viridis*) in a fragmented landscape. *Canadian Journal of Zoology* 92: 837-846.
- 748 Wickham, J. D., Riitters, K. H., Wade, T. G., Coan, M., and C. Homer. 2007. The effect of  
749 Appalachian mountaintop mining on interior forest. *Landscape Ecology* 22: 179-187.
- 750 Wickham J, Wood P.B., Nicholson M.C., Jenkins W., Druckenbrod D., Suter G.W., Mazzarella  
751 C., Gallow W., and Amos, J. 2013. The overlooked terrestrial impacts of mountaintop  
752 mining. *BioScience* 63: 335-348.
- 753 Willing, E. M., Dreyer, C., and Van Oosterhout, C. 2012. Estimates of genetic differentiation  
754 measured by  $F_{ST}$  do not necessarily require large sample sizes when using many SNP  
755 markers. *PloS one* 7:e42649.
- 756

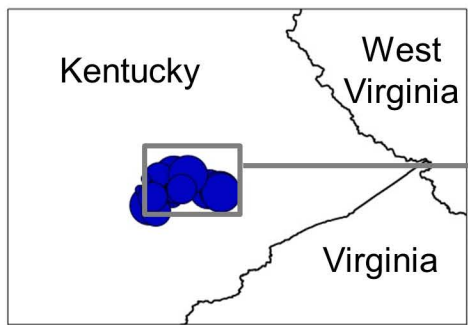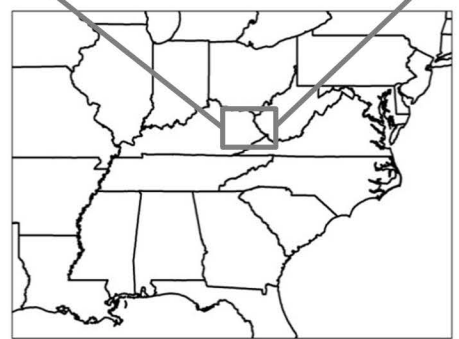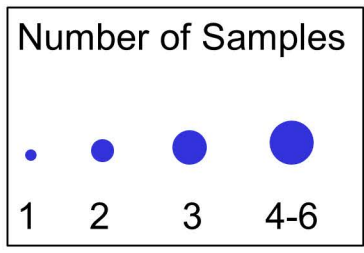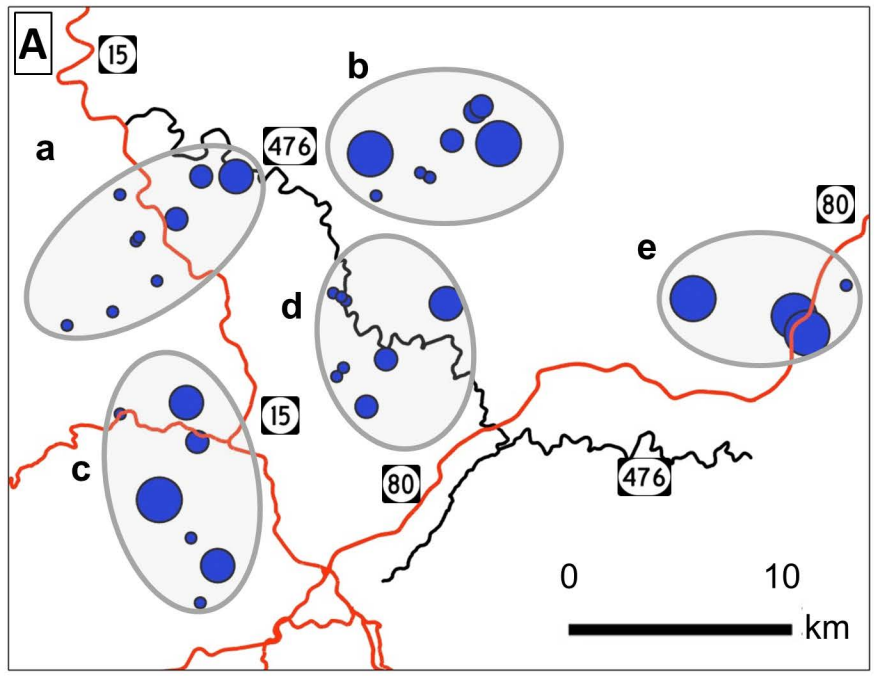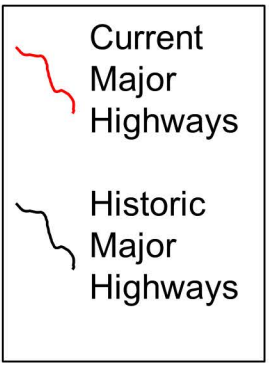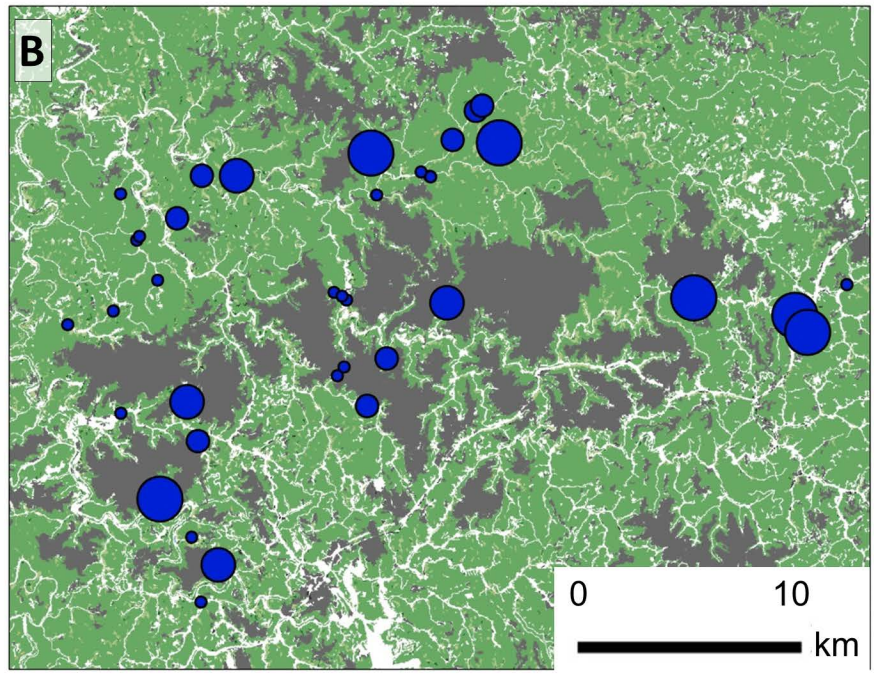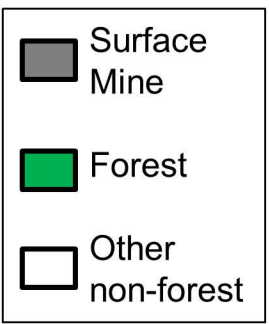

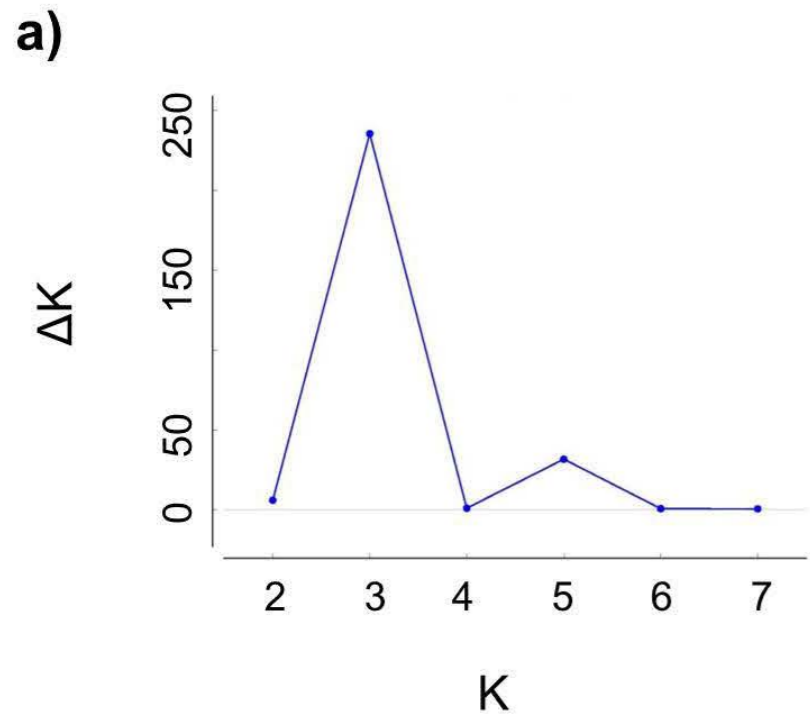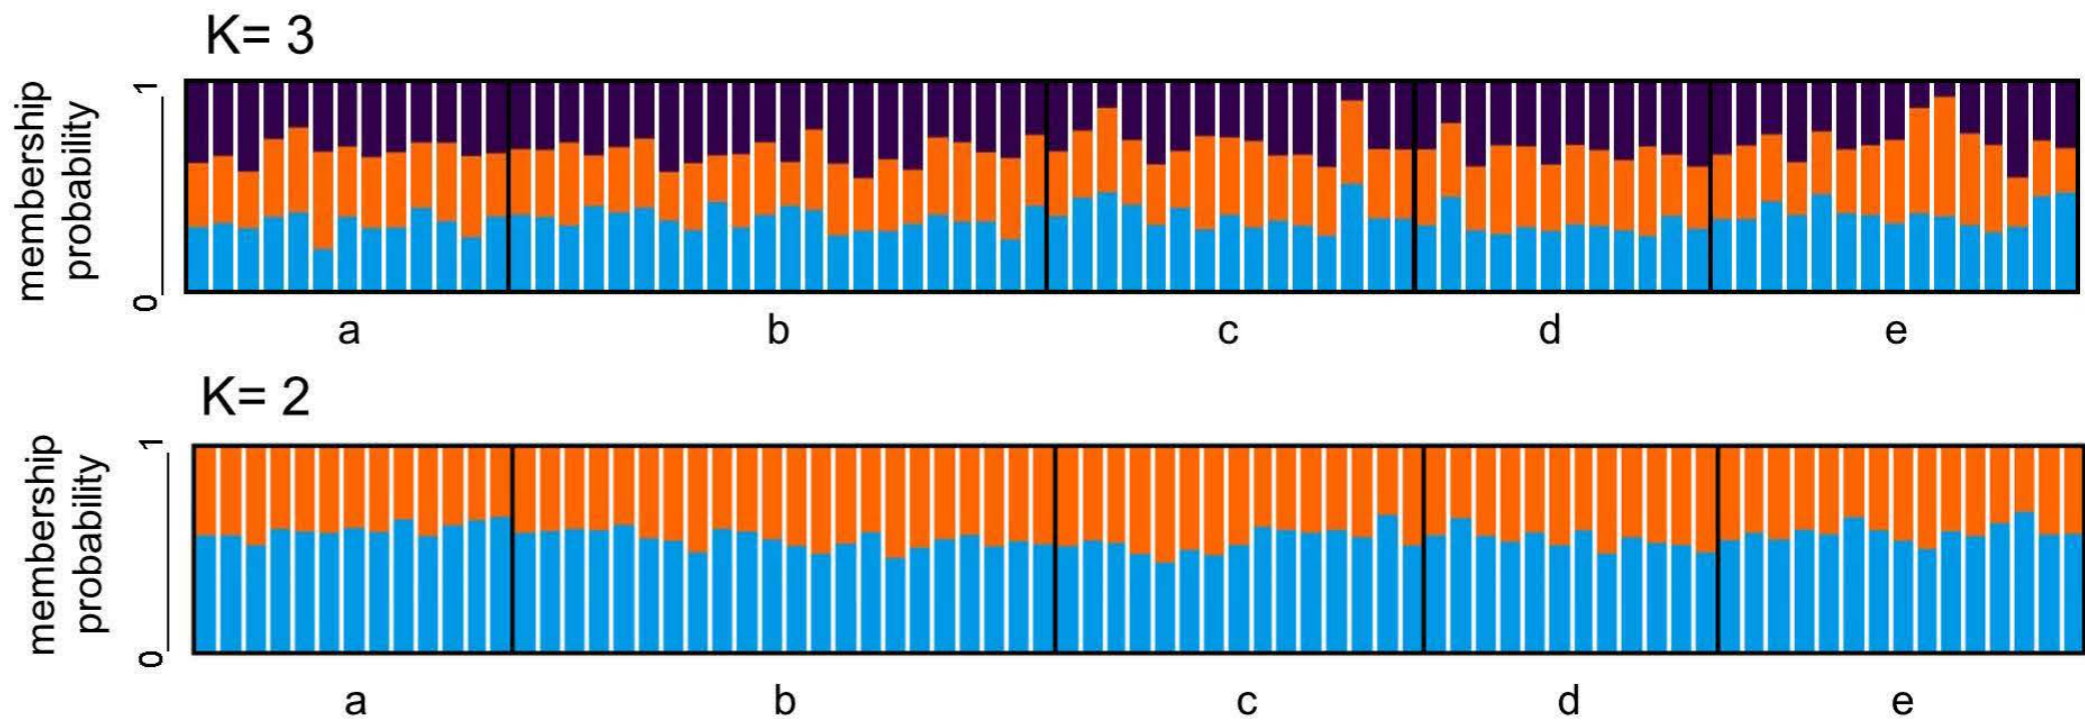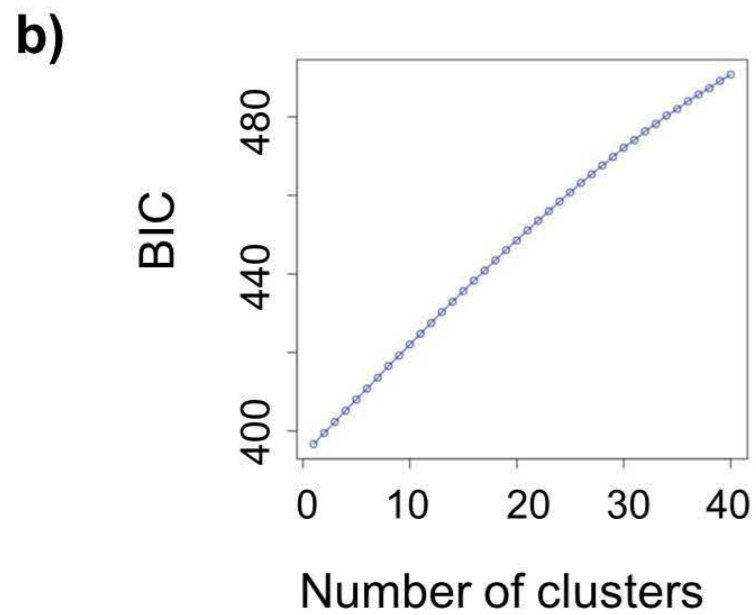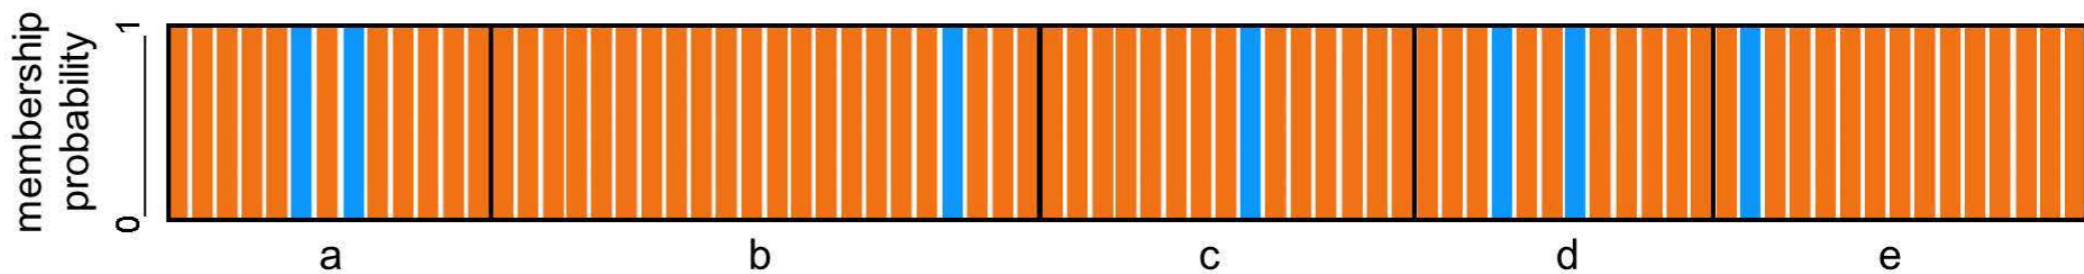



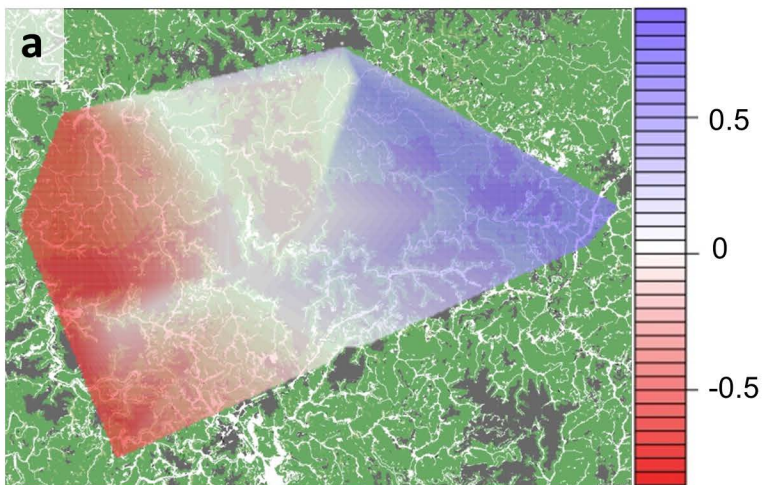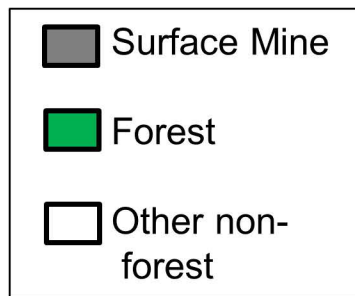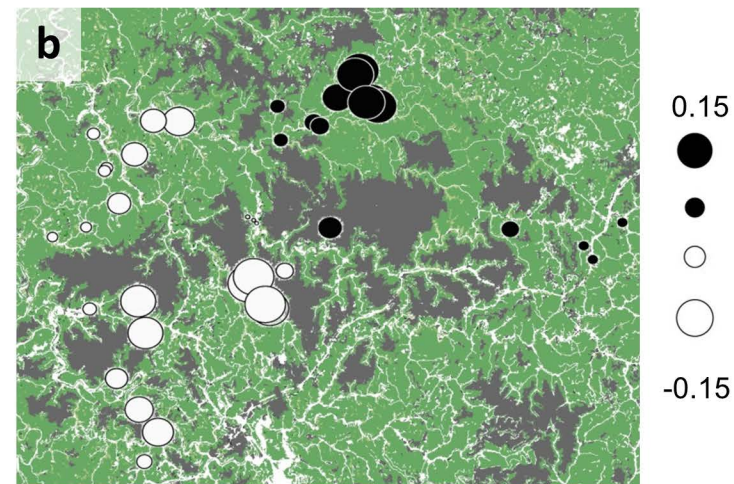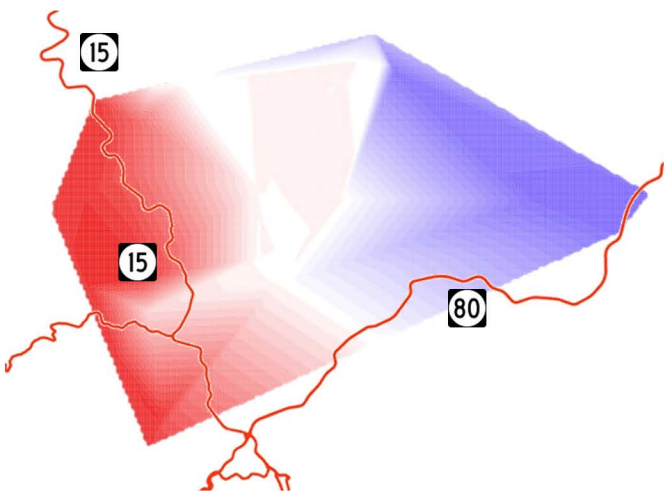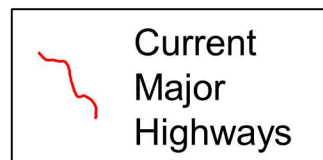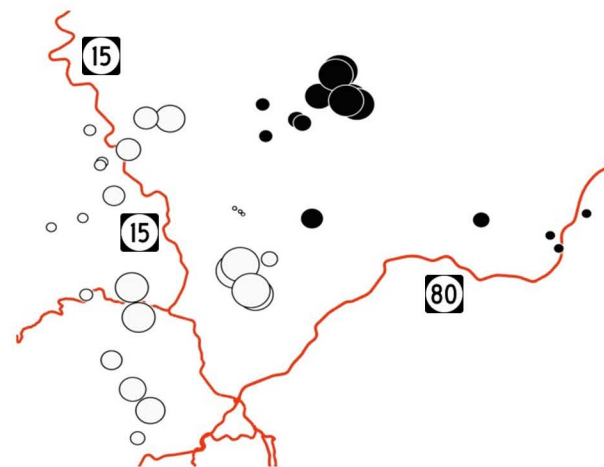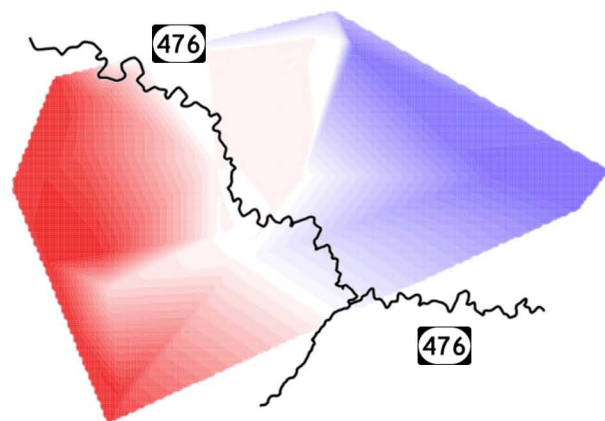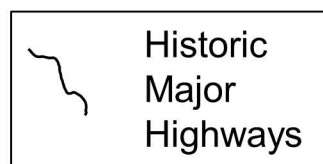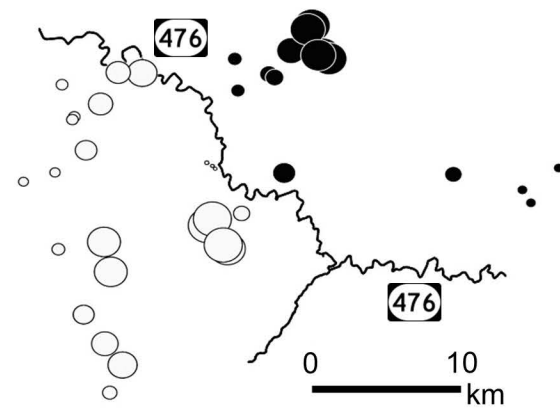

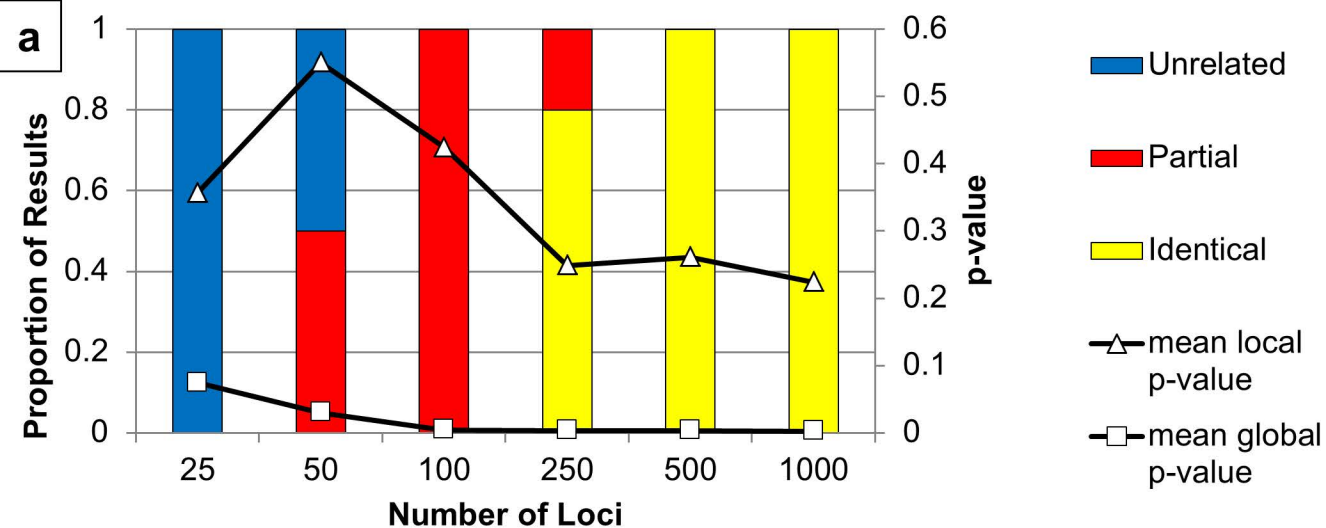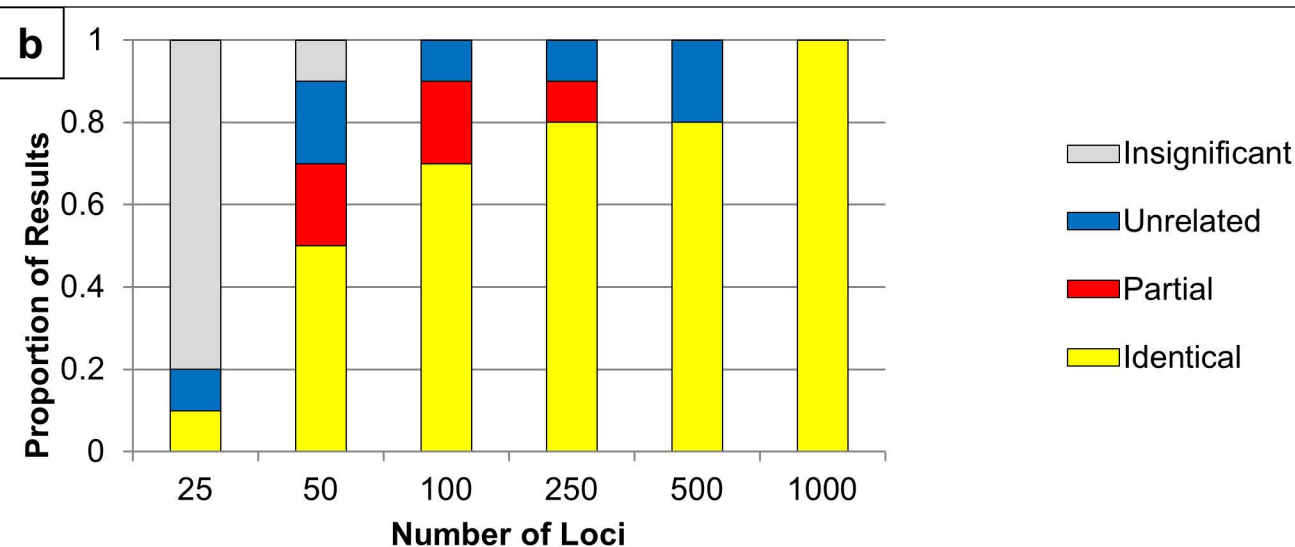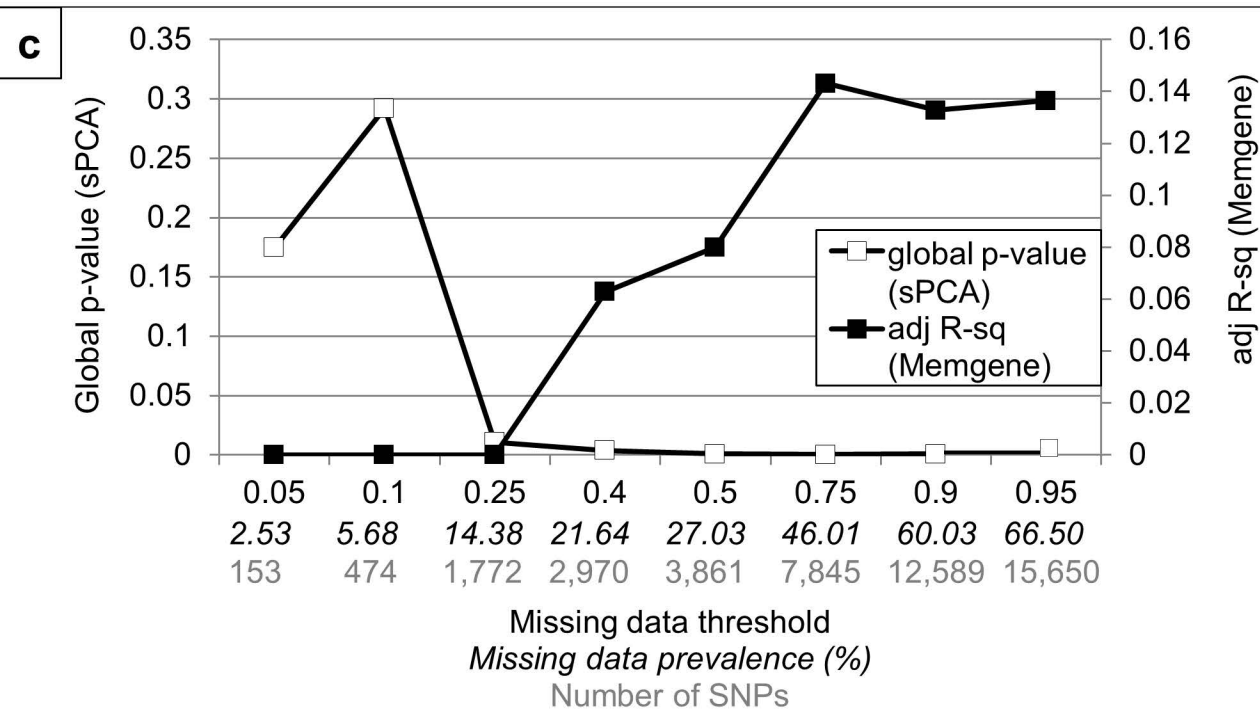

Source: https://www.biorxiv.org/content/10.1101/777920v1.full.pdf
